# Supplementary material for: PABPN1-Dependent mRNA Processing Induces Muscle Wasting
Source: PubMed Central journal article supplement (PMC4859507; doi:10.1371/journal.pgen.1006031), 2016-05-06
Supplement: pgen.1006031.s003.pdf [file pgen.1006031.s003.pdf]

**S3 Fig. Muscle histology with LWA300.**

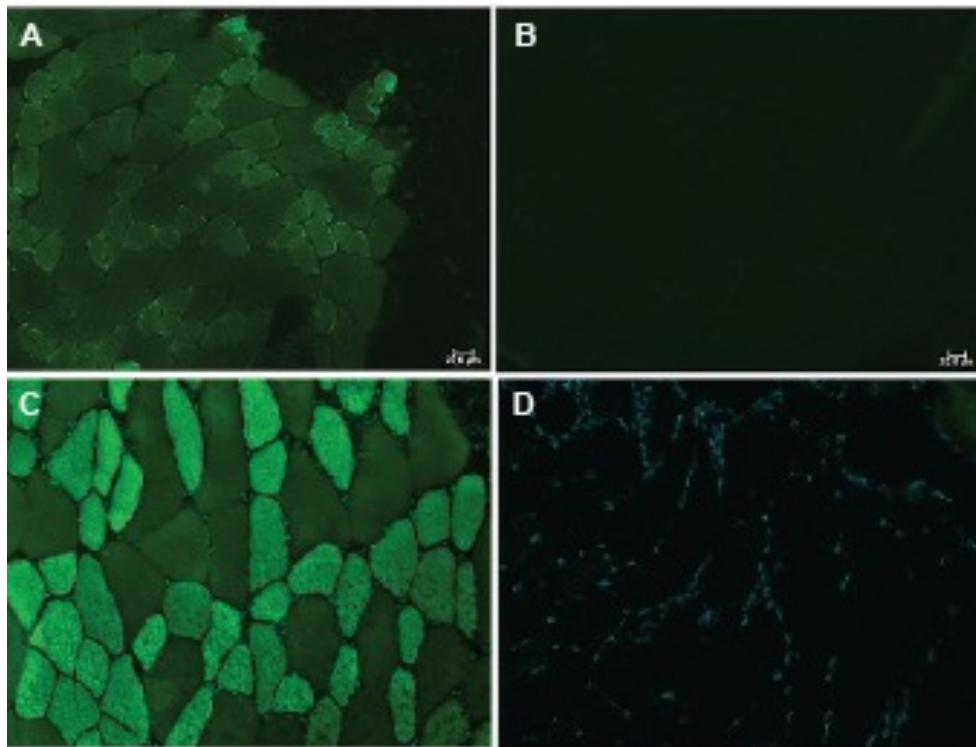

**A-B.** LWA300 signal in tibialis anterior muscles. Images show muscle cryosections after incubation with LWA300 (A) or LWA300 after Epox pre-incubation (B). **C.** EGFP signal in transduced muscle section prior to washings. **D.** EGFP signal after PBS, EDTA and methanol:PBS (1:1) washings. DAPI counterstains the nuclei.
