# Supplementary material for: PABPN1-Dependent mRNA Processing Induces Muscle Wasting
Source: PubMed Central journal article supplement (PMC4859507; doi:10.1371/journal.pgen.1006031), 2016-05-06
Supplement: pgen.1006031.s007.pdf [file pgen.1006031.s007.pdf]

**S7 Fig. MFI distribution plots for four MyHC isoforms.**

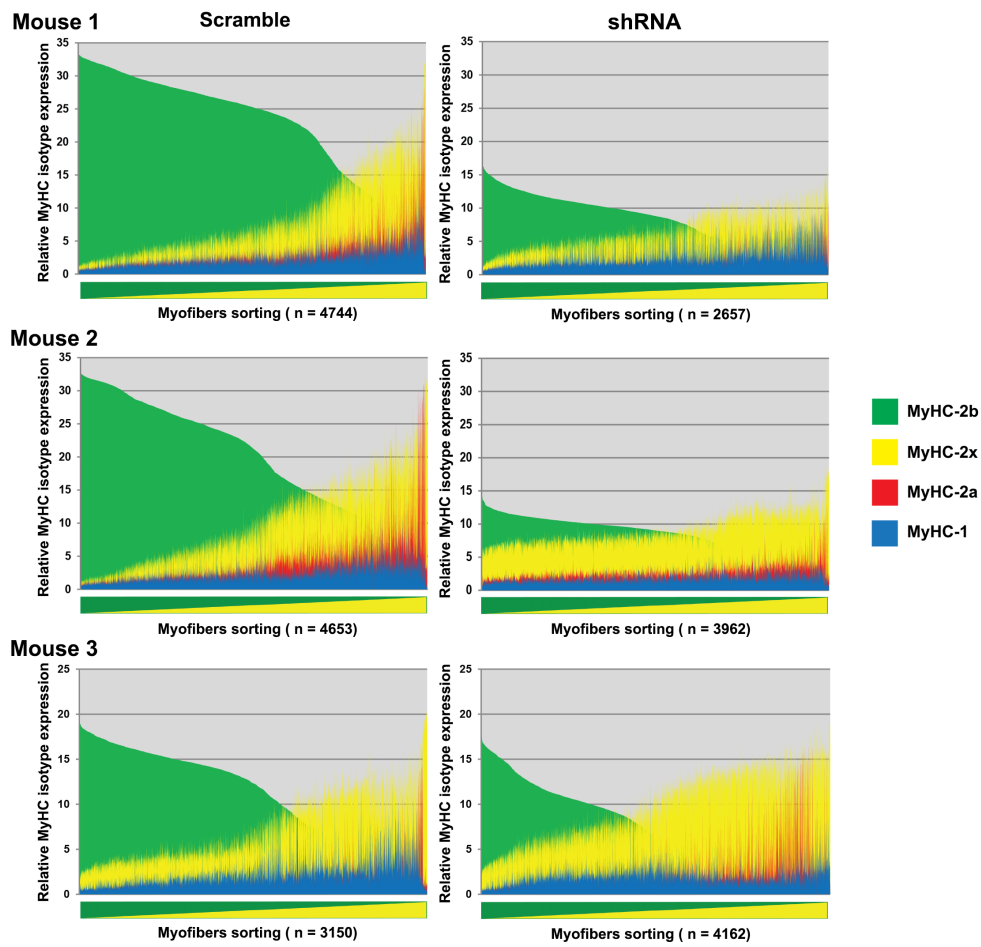

Plots are from three mice with a high Pabpn1 down-regulation (20-50%). Y-axis show MFI, and X-axis shows myofibers sorted by MyHC-2b high to low and MyHC-2x low to high.
