# Supplementary material for: PABPN1-Dependent mRNA Processing Induces Muscle Wasting
Source: PubMed Central journal article supplement (PMC4859507; doi:10.1371/journal.pgen.1006031), 2016-05-06
Supplement: pgen.1006031.s013.pdf [file pgen.1006031.s013.pdf]

**S2 Table. Primer list and their sequences**

| Gene                        | Ensemble ID        | Forward 5'-3'           | Reverse 5'-3'            |
|-----------------------------|--------------------|-------------------------|--------------------------|
| Hprt1                       | ENSMUSG00000025630 | CGTCGTGATTAGCGATGATG    | TTTTCCAAATCCTCGGCATA     |
| Pabpn1                      | ENSMUSG00000022198 | GCCTCACTTTTGAGGTGCTC    | AGGGGAATACCATGATGTCG     |
| Murf1                       | ENSMUSG00000028834 | TCGTTTCGAGCCTTACCTGTT   | AAGTGAAGCTGGCAGGTTCAA    |
| Atrogin-1 (Fbxo32) Proximal | ENSMUSG00000022358 | TGTGCTGGTGGGCAACATTA    | GGTGATCGTGAGGCCTTTGA     |
| Atrogin-1 (Fbxo32) Distal   | ENSMUSG00000022358 | CGTGTTAACTATGCACAGGGC   | GCACATAATCTGTCCAACCTTCC  |
| Psme3 Proximal              | ENSMUSG00000078652 | CCAGTTTTCCCATCACGATA    | GAGCAGCAATGCAGAGACAC     |
| Psme3 Distal                | ENSMUSG00000078652 | GGCAGGCTAATTGCAGAGAC    | GCGAAGGTCAAACCCATAGA     |
| Psm14 Proximal              | ENSMUSG00000026914 | GAATGGGATCCACAACCACT    | ATCACAGTCACCCTGGCTTT     |
| Psm14 Distal                | ENSMUSG00000026914 | TGATGTATTCTGAACAACCTTGG | TGGTGATGTGTGAGACACCTG    |
| Rad23 Proximal              | ENSMUSG00000003813 | ATGAGAATCTGGCTGCCAAC    | ACCCCCACCAACCTACTACC     |
| Rad23 Distal                | ENSMUSG00000003813 | CCTCCCCTCCGTAGAGATGT    | TTCCACCACCTTCTCTTTG      |
| Arih2 Proximal              | ENSMUSG00000064145 | TTCTGCAACTTTGCTGGATG    | CTGCTCCACATCACTGGCTA     |
| Arih2 Distal                | ENSMUSG00000064145 | TGGAGGCTGAGATCGAAAAC    | GCTGCTCTGCTATGTGCATC     |
| Arih1 Proximal              | ENSMUSG00000025234 | GTCAAACACGACATTTTGT     | CTATCCCCTTCTCCCTCAA      |
| Arih1 Distal                | ENSMUSG00000025234 | GGAAAACGGCTCCTTCATAA    | GGTTGGTTAATTCAGCTTGAAAA  |
| Rbx1 Proximal               | ENSMUSG00000022400 | CACTGCATCTCTCGATGGCT    | GGGTACGCCTTGCGGGAAG      |
| Rbx1 Distal                 | ENSMUSG00000022400 | GAACGAGTGACTGGCATCAA    | TGCCAGCCAAGATTACACAG     |
| Ubqln1 Proximal             | ENSMUSG00000005312 | ACATCAATGCAGCAATCGAA    | ACATCAATGCAGCAATCGAA     |
| Ubqln1 Distal               | ENSMUSG00000005312 | GTTGAATGTCGTGCTGTTCCG   | GGCTCTTTTTACCCAAATG      |
| Atg10 Proximal              | ENSMUSG00000021619 | AAGCAACATCACAATCGGAGT   | CTATCCCCTTCTCCCTCAA      |
| Atg10 Distal                | ENSMUSG00000021619 | CGCGTGTCTGTGGTGTGTAT    | AACAGAGCAGTCGTGGGTCT     |
| Atg12 Proximal              | ENSMUSG00000032905 | CCCAGACCAAGAAGTTGGAA    | CAGCACCGAAATGTCTCTGA     |
| Atg12 Distal                | ENSMUSG00000032905 | TAGAGGAGCCTCAGCCATGT    | ACGGCCAGTTTTCAAGATA      |
| Cyld Proximal               | ENSMUSG00000036712 | GCCTGGCTTTTCTTTGACAG    | AAGAGTGCAGGTCCTCCAGA     |
| Cyld Distal                 | ENSMUSG00000036712 | TCAAAGGTGTCAGAGCATGG    | TCCCCTAACATCTCCATCCA     |
| Myh1                        | ENSMUSG00000056328 | ACCTGGCCAAATTCGCAAG     | TGGTCACTTTCCTGCACTTG     |
| Myh2                        | ENSMUSG00000033196 | TGAAGTGGAGGGTGAAGTAG    | TCTGGTAAGTAAGCTCCTTC     |
| Myh4                        | ENSMUSG00000057003 | GAGTGAAGGAACTCACCTAC    | TTTCACTTTAGTCTGTAGTTTG   |
| Myh7                        | ENSMUSG00000053093 | AAGGGCCTGAATGAGGAGTA    | GCTTCCACCTAAAGGGCTGT     |
| Tnnt1                       | ENSMUSG00000064179 | GCTGGGAAGGGTTCGAGTTG    | GGGCACTTTATTTGAGTTAC     |
| F4/80                       | ENSMUSG00000004730 | CTTTGGCTATGGCTTCCAGTC   | GCAAGGAGGACAGAGTTTATCGTG |
| MCP-1                       | ENSMUSG00000035385 | CACTCACCTGCTGCTACTCA    | GCTTGGTGACAAAACTACAGC    |
| TNF $\alpha$                | ENSMUSG00000024401 | GATCGGTCCCAAAGGGATG     | CACTTGGTGGTTTGTACGAC     |
| NF- $\kappa$ B              | ENSMUSG00000028163 | CAGCTTTACAGAGTCTCTTAC   | CTTTGGATTCGCTTTGCCTTC    |
| EGFP                        | AAV-CMV-GFP vector | GGTCGGGGTAGCCGCTGAAG    | AGCTGGACGGCGACGTAAC      |
