# Supplementary material for: PABPN1-Dependent mRNA Processing Induces Muscle Wasting
Source: PLOS journal article supplement (doi:10.1371/journal.pgen.1006031), 2016-05-06
Supplement: S4 (10.1371/journal.pgen.1006031.s004) [file journal.pgen.1006031.s004]

**S4 Fig. Histological and molecular analyses of shPAB and Scram TA**

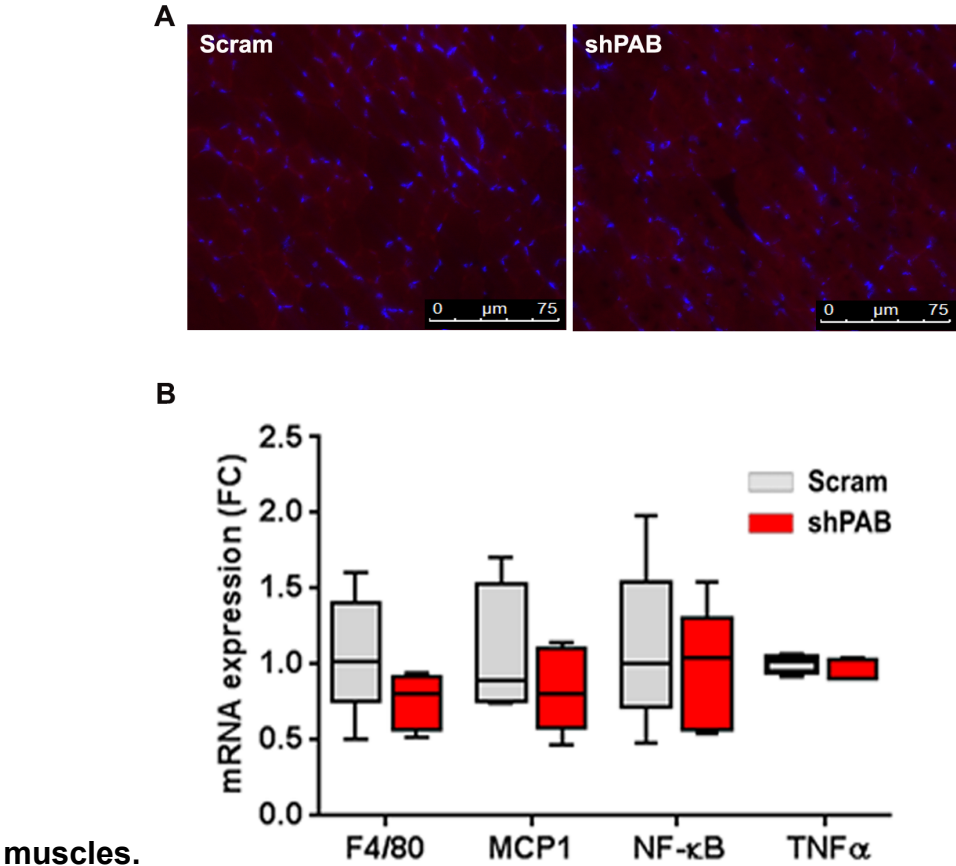

**A.** Representative images of Nile-Red staining for fatty droplets. Nuclei are counterstained with DAPI. **B.** mRNA expression of four inflammatory genes. CT values are normalized to *Hprt* house-keeping gene and data is presented in fold-change after normalization to PBS injected TA muscles. Measurements are from five animals.
